# Supplementary material
Source: PubMed Central journal article supplement (PMC7746622)
Supplement: NIHMS1634526-supplement-1634526_Supp_Tab1.pdf [file NIHMS1634526-supplement-1634526_Supp_Tab1.pdf]

Supplementary Table 1

10S myosin intramolecular interactions

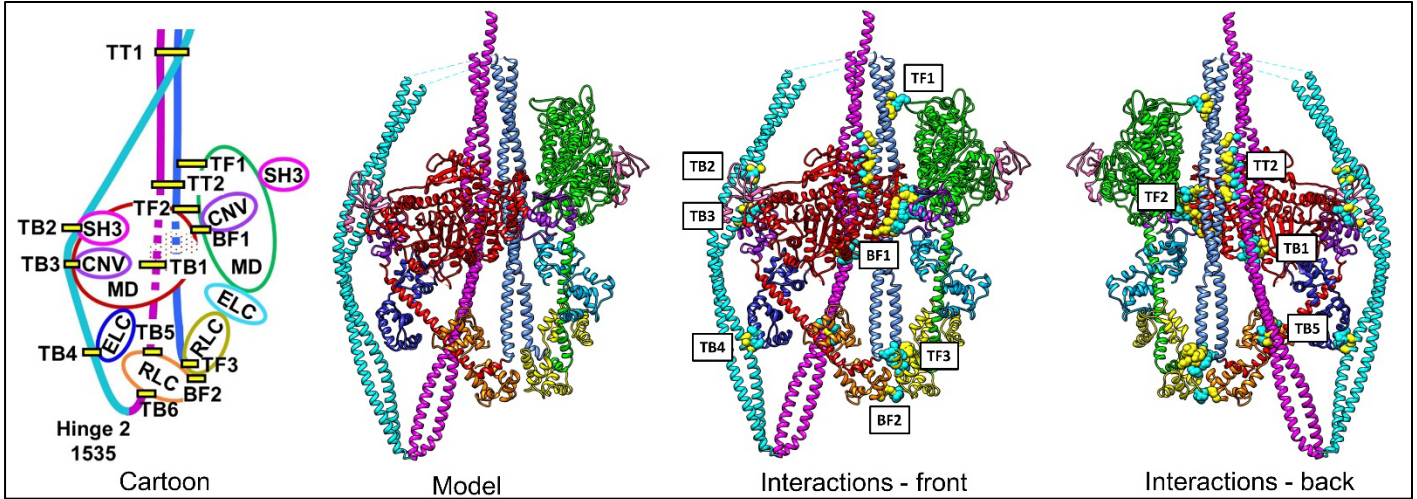

| Interaction<br>(Ref. 7<br>nomenclature) | BH<br>Loop/helix<br>(residues) | FH                                                 | Segment 1<br>(S2) | Segment 2 | Segment 3 | Figure                                                                                                                                                                           |
|-----------------------------------------|--------------------------------|----------------------------------------------------|-------------------|-----------|-----------|----------------------------------------------------------------------------------------------------------------------------------------------------------------------------------|
| <b>BF</b><br>BH/FH                      |                                |                                                    |                   |           |           | <p>The inset diagram shows interactions between the BH MD domain (residues 306, 380, 381-2, 385-6, 389, 395-6, 400) and the FH CnV domain (residues 167, 728-9, 731, 746-9).</p> |
| <b>BF1</b><br>MD/MD                     | L306                           | F746                                               |                   |           |           |                                                                                                                                                                                  |
|                                         | <b>C-loop<br/>(365-381)</b>    | <b>Helix<br/>(727-734)/<br/>Loop<br/>(735-748)</b> |                   |           |           |                                                                                                                                                                                  |
|                                         | D380                           | D748                                               |                   |           |           |                                                                                                                                                                                  |
|                                         | N381                           | D748<br>G749<br>R731                               |                   |           |           |                                                                                                                                                                                  |
|                                         | <b>Helix<br/>(382-390)</b>     | <b>Loop<br/>(735-748)</b>                          |                   |           |           |                                                                                                                                                                                  |
|                                         | T382                           | D748<br>F746                                       |                   |           |           |                                                                                                                                                                                  |
|                                         | Q385                           | F746<br>M747                                       |                   |           |           |                                                                                                                                                                                  |
|                                         | K386                           | F746                                               |                   |           |           |                                                                                                                                                                                  |
|                                         | H389                           | F746                                               |                   |           |           |                                                                                                                                                                                  |
|                                         | <b>Helix<br/>(395-403)</b>     | <b>Helix<br/>(729-734)/<br/>Loop<br/>(167-170)</b> |                   |           |           |                                                                                                                                                                                  |
|                                         | V395                           | Q728                                               |                   |           |           |                                                                                                                                                                                  |

|                                     |                                                                                             |                                                                   |                                           |                                                        |                  |                                                                                       |
|-------------------------------------|---------------------------------------------------------------------------------------------|-------------------------------------------------------------------|-------------------------------------------|--------------------------------------------------------|------------------|---------------------------------------------------------------------------------------|
| <b>BF2</b><br>RLC/RLC               | T396                                                                                        | Q728<br>E729                                                      |                                           |                                                        |                  | 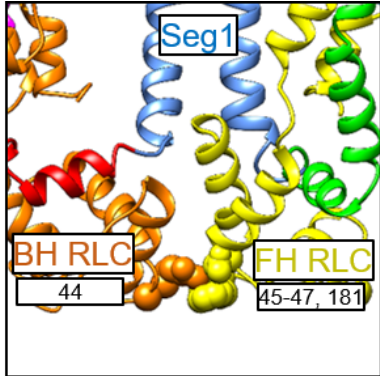   |
|                                     | R400                                                                                        | D167                                                              |                                           |                                                        |                  |                                                                                       |
|                                     | <b>RLC N-lobe<br/>Helix A-helix B<br/>linker<br/>(41-49)</b>                                | <b>RLC N-lobe<br/>Helix A-<br/>helix B<br/>linker<br/>(41-49)</b> |                                           |                                                        |                  |                                                                                       |
|                                     | R44                                                                                         | D45<br>G46<br>F47<br>N81                                          |                                           |                                                        |                  |                                                                                       |
|                                     | BH RLC/FH RLC<br>PD*                                                                        | Q42                                                               | K8                                        |                                                        |                  |                                                                                       |
|                                     | R44                                                                                         | K8                                                                |                                           |                                                        |                  |                                                                                       |
|                                     | E51                                                                                         | K12                                                               |                                           |                                                        |                  |                                                                                       |
|                                     | D55                                                                                         | K12                                                               |                                           |                                                        |                  |                                                                                       |
| <b>TB1</b><br>BH MD/seg1,3          | <b>Loop 635-655<sup>†</sup></b><br><br><b>Loop<br/>(450-460)</b><br><br>R455<br>Q456        |                                                                   | <b>Ring 1<sup>‡</sup></b><br>(~ 912-915?) |                                                        | ~L1604-<br>E1612 |   |
| <b>TB2</b><br>BH SH3/seg2           | <b>SH3</b><br>K72<br><br>D73                                                                |                                                                   |                                           | Q1432<br>L1435<br>D1436<br><br>L1431<br>Q1432<br>L1435 |                  |  |
| <b>TB3</b><br>BH Converter/<br>seg2 | <b>Converter</b><br>L766<br><br><b>Near converter</b><br>R718                               |                                                                   |                                           | L1452<br><br>Q1445<br>R1446                            |                  |  |
| <b>TB4</b><br>BH ELC/seg2           | <b>ELC N-lobe<br/>D helix<br/>(67-77)</b><br>E67<br>L70<br>P71<br><br>E67<br><br>E67<br>L70 |                                                                   |                                           | L1494<br><br>A1495<br><br>L1498                        |                  |  |

|                                                                |                                                                                                |                                               |                                                                                                         |  |                                                                                              |                                                                                       |
|----------------------------------------------------------------|------------------------------------------------------------------------------------------------|-----------------------------------------------|---------------------------------------------------------------------------------------------------------|--|----------------------------------------------------------------------------------------------|---------------------------------------------------------------------------------------|
| <p><b>TB5</b><br/>BH RLC/seg3</p>                              | <p><b>RLC C-lobe</b><br/><b>E helix (99-108)</b><br/>V101<br/><br/>N104<br/><br/><br/>C108</p> |                                               |                                                                                                         |  | <p>A1577<br/><br/>S1580<br/>Q1581<br/>R1584<br/><br/>E1583</p>                               | 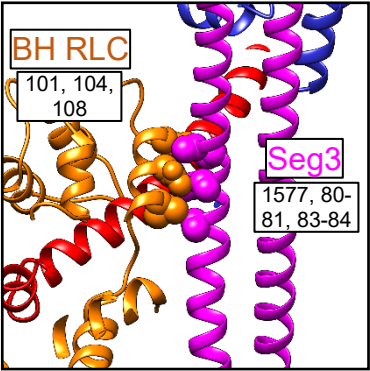   |
| <p><b>TB6</b><br/>BH RLC PD/seg3</p>                           | <p><b>RLC PD*</b><br/><br/>R4<br/><br/>A7<br/><br/>K11<br/><br/><br/>T18<br/><br/>F22</p>      |                                               |                                                                                                         |  | <p>E1572<br/><br/>E1565<br/><br/>L1561<br/>Q1562<br/>E1565<br/><br/>D1566<br/><br/>D1566</p> |                                                                                       |
| <p><b>TF1</b><br/>FH actin-binding loop/seg1,3<sup>§</sup></p> |                                                                                                | <p><b>CM loop (404-420)</b><br/><br/>R411</p> | <p><b>Ring 2<sup>‡</sup></b><br/><br/>E934<sup>  </sup><br/>E938<sup>  </sup><br/>E941<sup>  </sup></p> |  |                                                                                              |   |
| <p><b>TF2</b><br/>FH loop 626-658/seg1,3<sup>§</sup></p>       |                                                                                                | <p><b>Loop 2 (626-658)</b><br/><br/>R630</p>  | <p>E925<sup>  </sup></p>                                                                                |  |                                                                                              |  |

|                                                                             |  |                                                                                                                  |                                                                          |  |                                                                                               |                                                                                     |
|-----------------------------------------------------------------------------|--|------------------------------------------------------------------------------------------------------------------|--------------------------------------------------------------------------|--|-----------------------------------------------------------------------------------------------|-------------------------------------------------------------------------------------|
| <b>TF3#, **</b><br>FH RLC/seg1<br>(there is no<br>interaction with<br>seg3) |  | <b>RLC N-lobe<br/>         A-helix<br/>         (27-40)</b><br><br>Q27<br>S28<br>Q31<br>E32<br>K34<br>E35<br>M60 | L850<br>L851<br>Q852<br>R855<br>Q856                                     |  | No<br>interaction                                                                             | 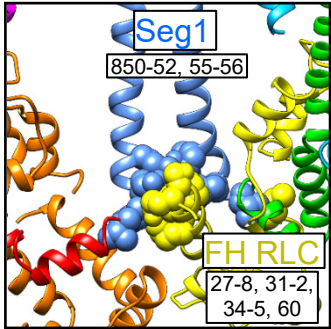 |
| <b>TT1</b><br>Segs 1, 2, 3 with<br>each other                               |  |                                                                                                                  | This region of the 10S molecule is not<br>included in the reconstruction |  |                                                                                               |                                                                                     |
| <b>TT2</b><br>Seg1/seg3 where<br>they cross the BH                          |  |                                                                                                                  | E914<br><br>R918<br><br>A921<br><br>K922<br><br>E925                     |  | D1631<br>V1632<br>L1635<br><br>L1635<br>V1639<br><br>N1643<br><br>N1643<br>R1646<br><br>N1643 |  |

**Legend:** The table shows potential interactions between different regions of the 10S atomic model, determined using the default parameters of the UCSF Chimera *Find Contacts* tool (proximity of van der Waals surfaces of atoms  $< 0.4 \text{ \AA}$ , thus typically center-to-center atomic distances  $\leq \sim 4.2 \text{ \AA}$ ). Because of limited resolution of the reconstruction, the table gives the general region of the contact (loop or helix, in **bold**), with the specific residues detected by Chimera (normal type). These specific contacts should be considered as approximate and provisional. Some loops are missing so there may be more interactions than we have detected. Note that the residue numbers in segments 2 and 3 are not definitive, as they depend on the assumption that hinge 2 occurs at E1535<sup>4</sup>, based on analysis of 2D class averages from negative stain data. These hinge locations could be in error by up to 3 amino acids<sup>4</sup>. Tail interactions may be more extensive than we report, as we have not included side-chains on segments 2 and 3—due to their absence from the density map and our uncertainty of the precise longitudinal positioning of the residues in these segments. All interactions are viewed from front except TB1, and TB5. See also Fig. 3 of text. Nomenclature for the different interactions is that defined by Yang et al., 2019<sup>7</sup> (see top panel). The interactions are labeled in the cartoon and shown in the images, with spheres for the residues involved and their numbers in boxes. In the cartoon, **B** = BH; **F** = FH; **T** = tail.

\* PD = phosphorylation domain (RLC N-terminal region residues 1-24). Density for the two PDs was less than for the rest of the RLC and so fitting is less certain. The fit is that for the MD simulation structures shown in Extended Data Fig. 8. The best fit positions suggest additional interactions between the RLCs, involving the FH PD (adding to BF2), and between the BH PD and seg3, creating interaction TB6, which would strengthen TB5.

<sup>†</sup> This loop is omitted from the atomic model as there was not sufficient density to model it accurately. Nevertheless, density in the region of this loop is seen extending from both the BH and FH to seg1, suggesting possible interaction.

‡ Rings 1, 2 and 3 are patches of negative charge in subfragment 2<sup>19</sup>.

§ In Yang et al., segs 1 and 3 were not resolved. Our model here shows that only seg1 is involved in interactions TF1 and TF2.

|| These residues are in the  $\alpha$ -helix that is part of the FH HC (chain M in the atomic model)

¶ This residue is in the  $\alpha$ -helix that is part of the BH HC (chain A in the atomic model)

# These potential interactions with the FH RLC occur at the very start of seg1, where the resolution is limiting. They are therefore less certain. The table therefore shows the overall groups of residues involved, without making a specific assignment for each individual interaction.

\*\* In addition to potential interactions with the FH RLC, seg1 also comes close to the BH and FH hooks. As with the interactions with the RLC, the hook interactions are less certain.
