# Supplementary material
Source: PubMed Central journal article supplement (PMC7746622)
Supplement: NIHMS1634526-supplement-1634526_Supp_Tab2.pdf [file NIHMS1634526-supplement-1634526_Supp_Tab2.pdf]

**Supplementary Table 2: Sequence alignment of myosin II heavy chains**

| Entry      | Entry name       | Myosin HC   | Acronym | Protein   | Organism                       | Length | Gene         |
|------------|------------------|-------------|---------|-----------|--------------------------------|--------|--------------|
| P35579     | MYH9_HUMAN       | Nonmuscle A | NMII-A  | Myosin-9  | <i>Homo sapiens</i> (Human)    | 1,960  | <i>MYH9</i>  |
| P35580     | MYH10_HUMAN      | Nonmuscle B | NMII-B  | Myosin-10 | <i>Homo sapiens</i> (Human)    | 1,976  | <i>MYH10</i> |
| P35749     | MYH11_HUMAN      | Smooth      |         | Myosin-2  | <i>Homo sapiens</i> (Human)    | 1,972  | <i>MYH11</i> |
| P10587     | MYH11_CHICK*     | Smooth      |         | Myosin-2  | <i>Gallus gallus</i> (Chicken) | 1,979  | <i>MYH11</i> |
| O08638     | MYH11_MOUSE      | Smooth      |         | Myosin-2  | <i>Mus musculus</i> (Mouse)    | 1,972  | <i>MYH11</i> |
| Q7Z406     | MYH14_HUMAN      | Nonmuscle C | NMII-C  | Myosin-14 | <i>Homo sapiens</i> (Human)    | 1,995  | <i>MYH14</i> |
| A0A125S9Y7 | A0A125S9Y7_9ARAC | Skeletal    |         | Myosin-2  | <i>Aphonopelma</i> (Tarantula) | 1,953  |              |

The table shows the sequence alignment of the human myosin II heavy chains analyzed in this work. There are three isoforms of nonmuscle myosin: A, B and C, corresponding to genes *MYH9*, *MYH10* and *MYH14*, respectively. These and the smooth muscle gene (*MYH11*) were compared with the chicken smooth muscle sequence, which has close identity to the turkey sequence constituting the 10S structure analyzed in this paper. Sequences were obtained from UniProtKB (<https://www.uniprot.org>) and the multiple sequence alignment was done using CLUSTAL O(1.2.4). The sequence for the turkey (*Meleagris gallopavo*) gizzard myosin was obtained from GenBank XP\_010717783.1, [https://www.ncbi.nlm.nih.gov/protein/XP\\_010717783.1](https://www.ncbi.nlm.nih.gov/protein/XP_010717783.1)). The turkey sequence differs at only 18 sites from chicken, highlighted in green below: 12 residues with strong similarity [“.”] and 4 residues with weak similarity [“.”]) to the chicken sequence (P10587). Loops (P-loop, C-loop, CM loop, H-loop, loops 2 and 3), SH3, switches 1 and 2, relay, strut, SH1 and SH2 helices, converter, invariant proline, lever arm, segments 1, 2 and 3, rings 1, 2 and 3, skips, hinges 1 and 2, and tail piece are highlighted in yellow and labelled according to the nomenclature of Ref. 21 for A0A125S9Y7. Symbols in last row: “\*” perfect alignment, “.” a site belonging to a group exhibiting strong similarity and “.” a site belonging to a group exhibiting weak similarity. The location of disease-causing mutations in smooth and nonmuscle myosin II (Extended Data Table 2) are highlighted in the alignment in blue (deletions: blue, duplications: blue) in their equivalent residues in the chicken (MYH11) sequence.

**CLUSTAL O(1.2.4) multiple sequence alignment**

```

                                     ←-----SH3-----
SP|P35579|MYH9HUMAN                -----M-AQQAADKYLVDKNF-----INNPLAQADWAAKKLWVWPS 36
SP|P35580|MYH10_HUMAN              -----MAQRT-GLEDPERYLFVDRAV-----IYNPATQADWTAKKLWVIPS 40
SP|P35749|MYH11_HUMAN              -----MAQKG-QLSDDEKFLFVDKNF-----INSPVAQADWAAKRLWVWPS 40
SP|P10587|MYH11_CHICK               -----MSQK-PLSDDEKFLFVDKNF-----VNNPLAQADWSAKKLWVWPS 39
SP|O08638|MYH11_MOUSE              -----MAQKG-QLSDDEKFLFVDKNF-----MNSPMAQADWVAKKLWVWPS 40
SP|Q7Z406|MYH14_HUMAN              MAAVTMSVPGRKAPPRP-----GPVPEAAQPFLFTPRGPSAGGGPGSGTSPQVEWTARRLWVWPS 60
TR|A0A125S9Y7|A0A125S9Y7_9ARAC    -----MAEDPDPTLEYLYISMEQ-----KRKDQTKPYDGKKMVWVAD 36
                                     :* :                               : . . . . . ** : .

```

-----SH3----->

```
SP|P35579|MYH9_HUMAN      DKSGFEPASLKEEVGEEAIVELVENGKKVKVNKDDIQKMNPPKFSKVEDMAELTCLNEAS 96
SP|P35580|MYH10_HUMAN    ERHGFEAASIKKEERGDEVMVELAENGKKAMVNKDDIQKMNPPKFSKVEDMAELTCLNEAS 100
SP|P35749|MYH11_HUMAN    EKQGFEAASIKKEEGDEVVVELVENGKKVTVGKDDIQKMNPPKFSKVEDMAELTCLNEAS 100
SP|P10587|MYH11_CHICK    EKHGFEAASIKKEEGDEVTVELQENGKKVTLKDDIQKMNPPKFSKVEDMAELTCLNEAS 99
SP|O08638|MYH11_MOUSE    EKQGFEAASIKKEEGDEVVVELVENGKKVTVGKDDIQKMNPPKFSKVEDMAELTCLNEAS 100
SP|Q7Z406|MYH14_HUMAN    ELHGFEEAALRDEGEEEAELAESEGRRLRLPRDQIQRMNPPKFSKAEDMAELTCLNEAS 120
TR|A0A125S9Y7|A0A125S9Y7_9ARAC EKEGYLLGLIKSTQGDICTVDIEGQ-ESRQVKKDLLQQVNPPKYEKCEDMSNLTYLNDAS 95
:  *:  .  :::  :  *::  .  .  :  :*  :*:  *****:  *  *****:  **  **:*
```

```
SP|P35579|MYH9_HUMAN      VLHNLKERYYSGLIYTYSGLFCVVINPYKNLPIYSEEIVEMYKGGKRHEMPPHIYAITDT 156
SP|P35580|MYH10_HUMAN    VLHNLKDRYYSGLIYTYSGLFCVVINPYKNLPIYSENI IEMYRGKKRHEMPPHIYAISES 160
SP|P35749|MYH11_HUMAN    VLHNLRERYFSGLIYTYSGLFCVNVNPKYKLPYSEKIVDMYKGGKRHEMPPHIYAIADT 160
SP|P10587|MYH11_CHICK    VLHNLRERYFSGLIYTYSGLFCVVINPYKQLPIYSEKI IDMYKGGKRHEMPPHIYAIADT 159
SP|O08638|MYH11_MOUSE    VLHNLRERYFSGLIYTYSGLFCVNVNPKYKLPYSEKIVDMYKGGKRHEMPPHIYAIADT 160
SP|Q7Z406|MYH14_HUMAN    VLHNLRERYYSGLIYTYSGLFCVVINPYKQLPIYTEAIVEMYRGKKRHEVPPHVYAVTEG 180
TR|A0A125S9Y7|A0A125S9Y7_9ARAC VLHNLKQRYANLIYTYSGLFCVAINPYKRFPIYTNRTVQIYKRRRTEVPPHLFAISDG 155
*****:  **:  .  *****:  *****  :  *****:  :  :  *:*  :  *  *****:  *  :  :
```

<----25-50 kDa loop---->

```
SP|P35579|MYH9_HUMAN      AYRSMMDREDQSILCTGESGAGKTENTKKVIQYLAVVASSHKSKKD---Q-----GE 206
SP|P35580|MYH10_HUMAN    AYRCMLQDREDQSILCTGESGAGKTENTKKVIQYLAHVASSHKGRKDNIP-----GE 213
SP|P35749|MYH11_HUMAN    AYRSMQDREDQSILCTGESGAGKTENTKKVIQYLAVVASSHKGKDDTSIT-----GE 213
SP|P10587|MYH11_CHICK    AYRSMQDREDQSILCTGESGAGKTENTKKVIQYLAVVASSHKGKDDTSITQGPFYSYGE 219
SP|O08638|MYH11_MOUSE    AYRSMQDREDQSILCTGESGAGKTENTQKVIQYLAVVASSHKGKDDSSIT-----GE 213
SP|Q7Z406|MYH14_HUMAN    AYRSMQDREDQSILCTGESGAGKTENTKKVIQYLAHVASSPKGRKEPGVP-----GE 233
TR|A0A125S9Y7|A0A125S9Y7_9ARAC AYSAMLANRENQSMILITGESGAGKTENTKKVIAYYANVGAATPKPGK---EAPTKEKKAT 212
**  .*:  :  **:*  :  *  *****:  *****  *  *  *  .  :  :
```

<-----Loop 1----->  
25/50 Junction







-----> Converter <----- Lever arm -----  
Pliant |

|                                |                                                                |     |
|--------------------------------|----------------------------------------------------------------|-----|
| SP P35579 MYH9_HUMAN           | LMIKALELDSNLYRIGQSKVFFRAGVLAHLEEEERDLKITDVIIGFQACCRGYLARKAFAK  | 801 |
| SP P35580 MYH10_HUMAN          | RMIRALELDPNLYRIGQSKIFFRAGVLAHLEEEERDLKITDIIFFQAVCRGYLARKAFAK   | 808 |
| SP P35749 MYH11_HUMAN          | LMIKALELDPNLYRIGQSKIFFRAGVLAHLEEEERDLKITDVIMAFQAMCRGYLARKAFAK  | 808 |
| SP P10587 MYH11_CHICK          | LMIKALELDPNLYRIGQSKIFFRAGVLAHLEEEERDLKITDVI IAFQAQCRGYLARKAFAK | 814 |
| SP O08638 MYH11_MOUSE          | LMIKALELDPNLYRIGQSKIFFRAGVLAHLEEEERDLKITDVIMAFQAMCRGYLARKAFTK  | 808 |
| SP Q7Z406 MYH14_HUMAN          | KMIQALELDPNLYRVGQSKIFFRAGVLAQLEEEERDLKVTDIIVSFQAAARGYLARRAFQK  | 825 |
| TR A0A125S9Y7 A0A125S9Y7_9ARAC | AVLGAIQLDANDYRLGNTKVVFFRAGVLRLEEMRDDRLGKIVTWLQAWIRWYLSKKEFKK   | 804 |

:: \*::\*\* \* \*\*::\*:\*:\*\*\*:\*\*\*.:\*\*\* \*\* :: :: :\*\* \* \*\*::: \* \*

-----< Segment 1 -----  
Invariant proline |

-----> Lever arm -----

|                                |                                                                |     |
|--------------------------------|----------------------------------------------------------------|-----|
| SP P35579 MYH9_HUMAN           | RQQQLTAMKVLQRNCAAYLKLNRWQWWRVFTKVKPLLQVSRQEEEMMAKEEEELVKVREKQ  | 861 |
| SP P35580 MYH10_HUMAN          | KQQQLSALKVLQRNCAAYLKLNRHWQWWRVFTKVKPLLQVTRQEEELQAKDEELLKVKKEKQ | 868 |
| SP P35749 MYH11_HUMAN          | RQQQLTAMKVIQRNCAAYLKLNRWQWWRVFTKVKPLLQVTRQEEEMQAKDEELQKTKERQ   | 868 |
| SP P10587 MYH11_CHICK          | RQQQLTAMKVIQRNCAAYLKLNRWQWWRVFTKVKPLLQVTRQEEEMQAKDEELQRTKERQ   | 874 |
| SP O08638 MYH11_MOUSE          | RQQQLTAMKVIQRNCAAYLKLNRWQWWRVFTKVKPLLQVTRQEEEMQAKDEELQKITERQ   | 868 |
| SP Q7Z406 MYH14_HUMAN          | RQQQSSALRVMQRNCAAYLKLNRHWQWWRVFTKVKPLLQVTRQDEVLQARAQELQKVQELQ  | 885 |
| TR A0A125S9Y7 A0A125S9Y7_9ARAC | LQEQRVALLVIQRNLRKFLTLRNWLWYKLYIKVKPLLTMKVEDELKALEEKLKKALES     | 864 |

\*: \* \* : \* : \*\*\* : \* . \*\* : \* \* : : : \* \* \* \* \* : : : : \* : : : \*

----- Segment 1 -----  
s1 -----< -----> s2  
<- Ring 1 -> <-----

|                                |                                                                     |     |
|--------------------------------|---------------------------------------------------------------------|-----|
| SP P35579 MYH9_HUMAN           | LAAENRLTEMETLQSQLMAEKLQEQLEQLQAE TELCAEAEELRARLTAKKQELEEIICH DLE    | 921 |
| SP P35580 MYH10_HUMAN          | TKVEGELEEMERKHQQLLEEKNILAEQLQAE TELFAEAEEMRARLAACKQELEEILHDLE       | 928 |
| SP P35749 MYH11_HUMAN          | QKAENELKELEQKHSQLEEKNTLLQEQLEQLQAE TELYAEAEEMRVRLAACKQELEEILHEME    | 928 |
| SP P10587 MYH11_CHICK          | QKAEAEELKELEQKHTQLCEEKNTLLQEQLEQLQAE TELYAEAEEMRVRLAACKQELEEILHEME  | 934 |
| SP O08638 MYH11_MOUSE          | QKAE TELKELEQKHTQLAE EKNTLLQEQLEQLQAE TELYAEAEEMRVRLAACKQELEEILHEME | 928 |
| SP Q7Z406 MYH14_HUMAN          | QQSAREVGELEQGRVAQLEEEERARLAEQLRAEAEELCAEAEETRGRLAARKQELELVVSELE     | 945 |
| TR A0A125S9Y7 A0A125S9Y7_9ARAC | EKEEKVRKDIEVQNVKLLQEKNDFLQLESERSGAGDVEERLTKAISMKNDLEGGVQELQ         | 924 |

::: : \* \* : \* : \* : \* . : : \* \* : : \* : \* \* : : :

-----Segment 1-----

--Ring 2 -->                      <-----Ring 3----->

```
SP|P35579|MYH9_HUMAN      ARVEEEERCQHLLQAEKKKMQQNIQELEEQLLEEEESARQKLQLEKVTTEAKLKKLEEEEQI  981
SP|P35580|MYH10_HUMAN     SRVEEEERNQILQNEKKKMQAHIQDLEEQLEDEEGARQKLQLEKVTAEAKIKKMEEEIIL  988
SP|P35749|MYH11_HUMAN     ARLEEEEDRGQQLQAERKKMAQQMLDLEEQLLEEEEAARQKLQLEKVTAEAKIKKLEDEIIL  988
SP|P10587|MYH11_CHICK     ARIEEEEERSQQLQAEEKKMQQQMLDLEEQLLEEEEAARQKLQLEKVTADGKIKKMEDDIL  994
SP|O08638|MYH11_MOUSE     ARLEEEEDRRQQLQAERKKMAQQMLDLEEQLLEEEEAARQKLQLEKVTAEAKIKKLEDDIIL  988
SP|Q7Z406|MYH14_HUMAN     ARVGEEEECRQMQTEKKRLQQHIQELEAHLEAEEGARQKLQLEKVTTEAKMKKFEEDLL  1005
TR|A0A125S9Y7|A0A125S9Y7_9ARAC  ERLSREEDAHSNLSSVRKKLDGEISNLKKEIEDLQLVIQKTEQDKAAKDHOIRNLNDEIA  984
* : .** :        :.    :*::    . : :* : .::    : . ** : :*.: : ::::~::~
```

-----Segment 1-----

```
SP|P35579|MYH9_HUMAN      ILEDQNCCLAKEKKLLEDRIAETFNTNLEEEEEKSKSLAKLKNKHEAMITDLEERLRREEK  1041
SP|P35580|MYH10_HUMAN     LLEDQNSKFIKEKKLMEDRIAECSSQLAEEEEEKAKNLAIRNKQEVMI SDLEERLKKEEK  1048
SP|P35749|MYH11_HUMAN     VMDDQNNKLSKERKLLLEERISDLTTNLAEEEEKAKNLTCLKNKHESMISELEVRLKKEEK  1048
SP|P10587|MYH11_CHICK     IMEDQNNKLTKERKLLLEERVS DLTTNLAEEEEKAKNLTCLKNKHESMISELEVRLKKEEK  1054
SP|O08638|MYH11_MOUSE     VMDDQNSKLSKERKLLLEERVS DLTTNLAEEEEKAKNLTCLKSKHESMISELEVRLKKEEK  1048
SP|Q7Z406|MYH14_HUMAN     LLEDQNSKLSKERKLLLEDRLAEFSSQAAEEEEKVKS LNKLRRLKYEATIADMEDRLRKEEK  1065
TR|A0A125S9Y7|A0A125S9Y7_9ARAC  HQDELINKLNREKKQM QEMGQKTGEDLQATEDKLNHMNKVKAKLEQTLDELED SLEREKK  1044
::    * : :** * :::    .    :        * : * : : * : : * * : : : * * : : : * * :
```

-----Segment 1-----

```
SP|P35579|MYH9_HUMAN      QRQELEKTRRKLEGDSTDLSDQIAELQAQIAELKMQLAKKEEELQAALARVEEEAAQKNM  1101
SP|P35580|MYH10_HUMAN     TRQELEKAKRKLDGETTDLQDQIAELQAQIDELKLQ LAKKEEELQ GALARGDDETLHKNN  1108
SP|P35749|MYH11_HUMAN     SRQELEKLRKLEGDASDFHEQIADLQAQIAELKMQ LAKKEEELQAALARLDDEIAQKNN  1108
SP|P10587|MYH11_CHICK     SRQELEKLRKLEGESSDLHEQIAELQAQIAELKAQLAKKEEELQAALARLEDETSQKNN  1114
SP|O08638|MYH11_MOUSE     SRQELEKLRKLEGDASDFHEQIADLQAQIAELKMQ LAKKEEELQAALARLDDEIAQKNN  1108
SP|Q7Z406|MYH14_HUMAN     GRQELEKLRRLDGESELQEQMVEQQQRAEELRAQLGRKEEELQAALARAEDEGGARAQ  1125
TR|A0A125S9Y7|A0A125S9Y7_9ARAC  LRGDVEKTRKRVGDLKLAQEAVADLEKNKKELEQALQRKEKEMASLSAKLEDEQGLVAK  1104
* : :** : :* : :* : .    :    : : : .    ** . * : ** : * : . * : : * :
```

-----Segment 1-----

|                                |                                                               |      |
|--------------------------------|---------------------------------------------------------------|------|
| SP P35579 MYH9_HUMAN           | ALKKIRELESQISELQEDLESERASRNKAEKQKRDLGEELEALKTELEDTLDSTAAQQEL  | 1161 |
| SP P35580 MYH10_HUMAN          | ALKVVRELQAQIAELQEDFESEKASRNKAEKQKRDLSEELEALKTELEDTLDTTAAQQEL  | 1168 |
| SP P35749 MYH11_HUMAN          | ALKKIRELEGHISDLQEDLDSEARAARNKAEKQKRDLGEELEALKTELEDTLDSTATQQEL | 1168 |
| SP P10587 MYH11_CHICK          | ALKKIRELESHISDLQEDLESEKAARNKAEKQKRDLSEELEALKTELEDTLDTTATQQEL  | 1174 |
| SP O08638 MYH11_MOUSE          | ALKKIRELEGHISDLQEDLDSEARAARNKAEKQKRDLGEELEALKTELEDTLDSTATQQEL | 1168 |
| SP Q7Z406 MYH14_HUMAN          | LLKSLREAQAALAEAQEDLESERVARTKAEKQRRDLGEELEALRGELEDTLDSTNAQQEL  | 1185 |
| TR A0A125S9Y7 A0A125S9Y7_9ARAC | LQKQIKELQARIEEEEELEAERQARAKAEKQRADLAREIEELSERLEEAGGATSQVEL    | 1164 |

\* ::\* :. : : :\*:::\* : \* \*\*\*\*\*: \*\*..\*:\* \* .\*\*:: ::\* :\* \*\*

><-----Segment 2-----

|                                |        |                                                                |      |
|--------------------------------|--------|----------------------------------------------------------------|------|
| Hinge 1                        | Skip 1 | RSKREQEVNILKKTLEEEAKTHEAQIQEMRQKHSQAVEELAEQLEQTKRVKANLEKAKQT   | 1221 |
| SP P35579 MYH9_HUMAN           |        | RTKREQEVAELKKALEEETKNHEAQIQDMRQRHATALEELSEQLEQAKRFKANLEKNKQG   | 1228 |
| SP P35580 MYH10_HUMAN          |        | RAKREQEVTVLKKAALDEETRSHEAQVQEMRQKHAQAVEELTEQLEQFKRAKANLDKNKQT  | 1228 |
| SP P35749 MYH11_HUMAN          |        | RAKREQEVTVLKRALEEETRTHEAQVQEMRQKHTQAVEELTEQLEQFKRAKANLDKTKQT   | 1234 |
| SP P10587 MYH11_CHICK          |        | RAKREQEVTVLKKAALDEETRSHEAQVQEMRQKHTQAVEELTEQLEQFKRAKANLDKSKQT  | 1228 |
| SP O08638 MYH11_MOUSE          |        | RSKREQEVTTELKKTLEEEETRIHEAAVQELRQRHGQALGELAEQLEQARRGKGAWEKTRLA | 1245 |
| SP Q7Z406 MYH14_HUMAN          |        | NKRREAEMAKLRDLLEESNIQHEQTLANLRKKHNDVVAELSEQIDQLNKHKARLEKEKAQ   | 1224 |
| TR A0A125S9Y7 A0A125S9Y7_9ARAC |        | . :** *: *:: :*:. ** : :*::* .: **:*::* .: * . :* :            |      |

-----Segment 2-----

|                                |                                                              |      |
|--------------------------------|--------------------------------------------------------------|------|
| SP P35579 MYH9_HUMAN           | LENERGELANEVQVLLQGGDSEHKRKKVQAQLQELQVQFNEGERVTELADKVTKLQVE   | 1281 |
| SP P35580 MYH10_HUMAN          | LETDNKELACEVQVQVKAESEHKRKKLDAQVQELHAKVSEGDRRLRVELAEKASKLQNE  | 1288 |
| SP P35749 MYH11_HUMAN          | LEKENADLAGELRVLGQAKQVEVHKKKKLEAQVQELQSKCSDGERARAEKLNKVKHLQNE | 1288 |
| SP P10587 MYH11_CHICK          | LEKDNADLANEIRLSQAKQDVEHKKKKLEVQLQDLQSKYDGERVTELNEKVKHLQIE    | 1294 |
| SP O08638 MYH11_MOUSE          | LEKENADLAGELRVLGQAKQVEVHKKKKLEVQLQDLQSKCSDGERARAEKLNKVKHLQNE | 1288 |
| SP Q7Z406 MYH14_HUMAN          | LEAEVSELRAELSSLQATARQEGEQRRRRLQLQEVQGRAGDGERARAEAAEKLQRAQAE  | 1305 |
| TR A0A125S9Y7 A0A125S9Y7_9ARAC | MKGELDDVRSVDHVNKEKANAQAKQLEMQLTELOGKMDEAHRSLGDFDAKKRLTVE     | 1284 |

:: : :. : : : \*:: :::: \* : : : : . . . . \* : : \*

-----Segment 2-----

SP|P35579|MYH9\_HUMAN LDNVTGLLSQSDSKSSKLTKDFSALESQEQDTQELLQEEENRQKLSLSTKLRQVEDEKNSF 1341  
SP|P35580|MYH10\_HUMAN LDNVSTLLEEAEEKGIKFAKDAASLESQEQDTQELLQEEETRQKLNLSRIRQLEEEKNSL 1348  
SP|P35749|MYH11\_HUMAN VESVTGMLNEAEGKAIKLAQDVASLSSQEQDTQELLQEEETRQKLNSTKLRQLEEEERNSL 1348  
SP|P10587|MYH11\_CHICK VENVTSLLNEAESKNIKLTQDVATLGSQEQDTQELLQEEETRQKLNVTTKLRQLEDDKNSL 1354  
SP|O08638|MYH11\_MOUSE VESVTGMLNEAEGKAIKLAQDVASLGSQEQDTQELLQEEETRQKLNSTKLRQLEDERNSL 1348  
SP|Q7Z406|MYH14\_HUMAN LENVSGALNEAESKTIRLSKELSSTEAQLHDAQELLQEEETRAKLALGSRVRAMEAEAAGL 1365  
TR|A0A125S9Y7|A0A125S9Y7\_9ARAC NTELTRQLEDAESQVLSKLTSLQEQLEDTKRMADEESRERATAMGKFRSVEHDLDSL 1344  
::: \*::: : :::\* :: :\*\*.\*::: :\*\*.\* : ::: :\* : .:

-----Segment 2-----

SP|P35579|MYH9\_HUMAN REQLEEEEEAKHNLEKQIATLHAQVADMKKKMED-SVGCLETAEEVKKRKLQKDLGLSQR 1400  
SP|P35580|MYH10\_HUMAN QEQQEEEEEEARKNLEKQVLALQSQLADTKKKVDD-DLGTIESLEEAKKKLLKDAEALSQR 1407  
SP|P35749|MYH11\_HUMAN QDQLDEEMEAKQNLERHISTLNIQLSDSKKKLQD-FASTVEALEEGKKRFQKEIENLTQQ 1407  
SP|P10587|MYH11\_CHICK QEQLEDEEVEAKQNLERHISTLTIQLSDSKKKLQD-FTATVETMEEGKKKQREIESLTQQ 1413  
SP|O08638|MYH11\_MOUSE QDQLDEEMEAKQNLERHVSTLNIQLSDSKKKLQD-FASTIEVMEEGKKRLQKEMEGLSQQ 1407  
SP|Q7Z406|MYH14\_HUMAN REQLEEEAAARERAGRELQTAQAQLSEWRRRQEE-EAGALEAGEEARRRAAREAEALTQR 1424  
TR|A0A125S9Y7|A0A125S9Y7\_9ARAC REQIDEEQEGKADLQRQLSKANAQVQLWRSKYESEGLARLEELEESKRKLDKALQEQAMET 1404  
::\* :\*\* .: ::: : : : . :\* \*\* ::: . : :

-----Segment 2-----

SP|P35579|MYH9\_HUMAN HEKVAAAYDKLEKTKTRLQEQELDDLLVDLDHQRSACNLEKKQKKFDQLLAEKTIISAKY 1460  
SP|P35580|MYH10\_HUMAN LEEKALAYDKLEKTKNRLQEQELDDLTVDLDHQRVASNLEKKQKKFDQLLAEKSIISARY 1467  
SP|P35749|MYH11\_HUMAN YEEKAAAYDKLEKTKNRLQEQELDDLVVDLDNQRQLVSNLEKKQKKFDQLLAEKNISSKY 1467  
SP|P10587|MYH11\_CHICK FEEKAAAYDKLEKTKNRLQEQELDLVVDLDNQRQLVSNLEKKQKKFDQLLAEKNISSKY 1473  
SP|O08638|MYH11\_MOUSE YEEKAAAYDKLEKTKNRLQEQELDDLVVDLDNQRQLVSNLEKKQKKFDQLLAEKNISSKY 1467  
SP|Q7Z406|MYH14\_HUMAN LAEKTETVDRLERGRRRLQEQELDDATMDLEQQRQLVSTLEKKQKKFDQLLAEKKA AVLRA 1484  
TR|A0A125S9Y7|A0A125S9Y7\_9ARAC IDQLNSKTSGLEKTKSRLQEQELEDMTIEVEKANALASAMEKKQKSFDRIISEWKQKVDL 1464  
: . \*\* : \*\*\* \*\*:\* :::: . .. :\*\*\*\*:\*\*\*:::\* \*

-----Segment 2-----

|                                |                                                                |      |
|--------------------------------|----------------------------------------------------------------|------|
| SP P35579 MYH9_HUMAN           | AEERDRAEAEAREKETKALSLARALEEAMEQKAELERLNKQFRTEMEDLMSSKDDVVGKSV  | 1520 |
| SP P35580 MYH10_HUMAN          | AEERDRAEAEAREKETKALSLARALEEAELEAKEEFERQNKQLRADMEDLMSSKDDVVGKNV | 1527 |
| SP P35749 MYH11_HUMAN          | ADERDRAEAEAREKETKALSLARALEEAELEAKEELERTNKMLKAEMEDLVSSKDDVVGKNV | 1527 |
| SP P10587 MYH11_CHICK          | ADERDRAEAEAREKETKALSLARALEEAELEAKEELERTNKMLKAEMEDLVSSKDDVVGKNV | 1533 |
| SP O08638 MYH11_MOUSE          | ADERDRAEAEAREKETKALSLARALEEAELEAKEELERTNKMLKAEMEDLVSSKDDVVGKNV | 1527 |
| SP Q7Z406 MYH14_HUMAN          | VEERERAEAEGREREARALSLTRALEEEQEAREELERQNRALRAELEALLSSKDDVVGKSV  | 1544 |
| TR A0A125S9Y7 A0A125S9Y7_9ARAC | ALELDASQKECRNYSTEVEFKLRSQYEESQEHYESVKRENKNLQDEIKDLVDQLGEGGRSV  | 1524 |

. \* : : \* \* : . . . . \*      \* \*      \*      . . : \* \* : : : : \* . . . : \* . . \*

><-----segment 3-----

|                                |                                                                |        |
|--------------------------------|----------------------------------------------------------------|--------|
| Hinge 2                        |                                                                | Skip 2 |
| SP P35579 MYH9_HUMAN           | HELEKSKRALEQQVEEMKTQLEEELEDELQATEDAKLRLEVNLMQAMKAQFERDLQGRDEQS | 1580   |
| SP P35580 MYH10_HUMAN          | HELEKSKRALEQQVEEMRTQLEEELEDELQATEDAKLRLEVNLMQAMKAQFERDLQTRDEQN | 1587   |
| SP P35749 MYH11_HUMAN          | HELEKSKRALETQMEEMKTQLEEELEDELQATEDAKLRLEVNLMQALKGQFERDLQARDEQN | 1587   |
| SP P10587 MYH11_CHICK          | HELEKSKRTLEQQVEEMKTQLEEELEDELQAAEDAKLRLEVNLMQAMKSQFERDLQARDEQN | 1593   |
| SP O08638 MYH11_MOUSE          | HELEKSKRALETQMEEMKTQLEESEDDVQATEDAKLRLEVNLMQALKGQFERDLQARDEQN  | 1587   |
| SP Q7Z406 MYH14_HUMAN          | HELERACRVAEQAANDLRAQVTELEDELTAEDAKLRLEVTVQALKTQHERDLQGRDEAG    | 1604   |
| TR A0A125S9Y7 A0A125S9Y7_9ARAC | HELEKARKRLELEKEELQAALEEAEEAALEQEENKVLRAQLELSQVRQEIDRRLQEKEEEF  | 1584   |

\*\*\*\*: : \*      : : : : : \* \*      :      \* :      \* \*      : : . . : : \* \*      : : \*

-----Segment 3-----

|                                |                                                               |      |
|--------------------------------|---------------------------------------------------------------|------|
| SP P35579 MYH9_HUMAN           | EEKKKQLVRQVREMEAELEDERKQRSMAVAARKKLEMDLKDLEAHIDSANKNRDEAIKQL  | 1640 |
| SP P35580 MYH10_HUMAN          | EEKKRLLIKQVRELEAELEDERKQRALAVASKKKMEIDLKDLEAQIEAANKARDEVIKQL  | 1647 |
| SP P35749 MYH11_HUMAN          | EEKRRQLQRQLHEYETELEDERKQRALAAAARKKLEGLDKDLELQADSAIKGREEAIKQL  | 1647 |
| SP P10587 MYH11_CHICK          | EEKRRQLLQQLHEHEETELEDERKQRALAAAARKKLEVDVKDLESQVDSANKAREEAIKQL | 1653 |
| SP O08638 MYH11_MOUSE          | EEKRRQLQRQLHEYETELEDERKQRALAAAARKKLEGLDKDLELQADSAIKGREEAIKQL  | 1647 |
| SP Q7Z406 MYH14_HUMAN          | EERRRQLAKQLRDAEVERDEERKQRTLAVAARKKLEGELEELKAQMASAGQGKEEAVKQL  | 1664 |
| TR A0A125S9Y7 A0A125S9Y7_9ARAC | ENTRKNHQRAIDSMQASLEAEAKGKAEALRMKKKLESINELEIALDHSNKANAEAQKNI   | 1644 |

\* : : :      : : . . . : \* \* : : \*      : \* \* : : : \* :      : : . \* . \* : :

-----Segment 3-----

SP|P35579|MYH9\_HUMAN RKLQAQMKDCMRELDTRASREEILAQAKENEKLLKSMEAEMIQLQEELAAAERAKRQAQ 1700  
SP|P35580|MYH10\_HUMAN RKLQAQMKDYQRELEEARASRDEIFAQSKESEKLLKSLEAEILQLQEELASSERARRHAE 1707  
SP|P35749|MYH11\_HUMAN RKLQAQMKDFQRELEEDARASRDEIFATAKENEKKAQSLEADLMQLQEDLAAAERARKQAD 1707  
SP|P10587|MYH11\_CHICK RKLQAQMKDYQRDLDDARAAREEIFATARENEKKAQNLEAELIQLQEDLAAAERARKQAD 1713  
SP|O08638|MYH11\_MOUSE RKLQAQMKDFQRELDARASRDEIFATSKENEKKAQSLEADLMQLQEDLAAAERARKQAD 1707  
SP|Q7Z406|MYH14\_HUMAN RKMQAQMKELWREVEETRTRTSREEIFSQNRESEKRLKGLEAEVLRRLQEELAASDRARRQAQ 1724  
TR|A0A125S9Y7|A0A125S9Y7\_9ARAC KKYQIQLKETQQALEEEQRARDEVREQYAMSEKRCNAMHGELEESRQLLEQADRARRAAD 1704  
:\* \* \*:\* : : : : \*:\* : \* : : : : : \* : : \* : \* :

-----Segment 3-----

SP|P35579|MYH9\_HUMAN QERDELADEIANSSGKGALALEEKRRLEARIAQLEEELEEEQGNTELINDRLKKANLQID 1760  
SP|P35580|MYH10\_HUMAN QERDELADEITNSASGKSALLDEKRRLEARIAQLEEELEEEQSNMELLNDRFRKTTLQVD 1767  
SP|P35749|MYH11\_HUMAN LEKEELAEELASSLSGRNALQDEKRRLEARIAQLEEELEEEQGNMEAMSDRVRKATQQAE 1767  
SP|P10587|MYH11\_CHICK LEKEEMAEELASANSGRGTSLQDEKRRLEARIAQLEEELEEEHNSNIEHMSDRMRKAVQQAE 1773  
SP|O08638|MYH11\_MOUSE LEKEELAEELASSLSGRNTLQDEKRRLEARIAQLEEELEEEQGNMEAMSDRVRKATLQAE 1767  
SP|Q7Z406|MYH14\_HUMAN QDRDEMADEVANGNLSKAAILEEKRLQLEGRGLGQLEEELEEEQSNSELLNDRYRKLQLQVE 1784  
TR|A0A125S9Y7|A0A125S9Y7\_9ARAC SELAELHENVNELSAQNSSLSMAKRKLEGEMQALHADLDEMLNEAKSSEEKAKKAMVDAA 1764  
: \* : : : . \*:\*:\* : \* . : \* : \* . : : . : : \* :

-----Segment 3-----

Skip 3

SP|P35579|MYH9\_HUMAN QINTDLNLSHAQKNENARQQLERQNKELKVKLQEMEGTVKSKYKASITALEAKIAQLE 1820  
SP|P35580|MYH10\_HUMAN TLNAELAAERSAAQKSDNARQQLERQNKELKAKLQLELEGAVKSKFKATISALEAKIGQLE 1827  
SP|P35749|MYH11\_HUMAN QLSNELATERSTAQKNESARQQLERQNKELRSKLHEMAGAVKSKFKSTIAALEAKIAQLE 1827  
SP|P10587|MYH11\_CHICK QLNELATERATAQKNENARQQLERQNKELRSKLQEMEGAVKSKFKSTIAALEAKIASLE 1833  
SP|O08638|MYH11\_MOUSE QLSNELATERSTAQKNESARQQLERQNKELRSKLQEVAVKAKLKSTVAALEAKIAQLE 1827  
SP|Q7Z406|MYH14\_HUMAN SLTTELSAERSFSAKAESGRQQLERQIQELRGRGLGEEDAGARARHKMTIAALESKLAQAE 1844  
TR|A0A125S9Y7|A0A125S9Y7\_9ARAC RLADLRAEQEHAQQQEKMRKAMEGQIKELQVRLDEAEAAALKGGKKIIOKLEQKVRELE 1824  
: : \* \* : : : . \* : \* \* : \* : \* : \* : \* : \* : \* \* \* : . \*

-----Segment 3-----

|                                |                                                               |      |
|--------------------------------|---------------------------------------------------------------|------|
| SP P35579 MYH9_HUMAN           | EQLDNETKERQAACKQVRRTEKKLKDVLQVDDERRNAEQYKDQADKASTRLKQLKRQLE   | 1880 |
| SP P35580 MYH10_HUMAN          | EQLEQEAKERAAANKLVRRTTEKKLKEIFMQVEDERRHADQYKEQMEKANARMKQLKRQLE | 1887 |
| SP P35749 MYH11_HUMAN          | EQVEQEAREKQAATKSLKQKDKKLKEILLQVEDERKMAEQYKEQAEKGNARVKQLKRQLE  | 1887 |
| SP P10587 MYH11_CHICK          | EQLEQEAREKQAAAKTLRQKDKKLKDALLQVEDEKQAEQYKDQAEKGNLRLKQLKRQLE   | 1893 |
| SP O08638 MYH11_MOUSE          | EQVEQEAREKQAATKSLKQKDKKLKEVLLQVEDERKMAEQYKEQAEKGNTKVKQLKRQLE  | 1887 |
| SP Q7Z406 MYH14_HUMAN          | EQLEQETRERILSGKLVRRRAEKRLKEVVLQVEEERRVADQLRDQLEKGNLRVKQLKRQLE | 1904 |
| TR A0A125S9Y7 A0A125S9Y7_9ARAC | TELDNEQRRHSEAANKVRRSERRVKELQFQAEEDRKNQERMQDLVDKLOQKIKTYKRQIE  | 1884 |

:::\* :: : \* :: : :::\* : \*::\*: : : : \* . ::\* \*\*:\*

-----Segment 3-----

|                                |                                                               |      |
|--------------------------------|---------------------------------------------------------------|------|
| SP P35579 MYH9_HUMAN           | EAEERANASRRKLQRELEDATETADAMNREVSSLKKNLRRGDLP-FVVP-RRMARKG     | 1938 |
| SP P35580 MYH10_HUMAN          | EAEERATRASRRKLQRELDDEANEGLSREVSTLKNLRRGGPI-SFSS-SRSGRRQ       | 1945 |
| SP P35749 MYH11_HUMAN          | EAEERQRINANRRKLQRELDDEATESNEAMGREVNALKSKLRRGNE-TSFVPSRRSGGRR  | 1946 |
| SP P10587 MYH11_CHICK          | EAEERQRINANRRKLQRELDDEATESNDALGREVAALKSKLRRGNEPVSFAPRRSGGRR   | 1953 |
| SP O08638 MYH11_MOUSE          | EAEERQICINANRRKLQRELDDEATESNEAMGREVNALKSKLRRGNE-ASFVPSRRAGGRR | 1946 |
| SP Q7Z406 MYH14_HUMAN          | EAEERASRAQAGRRRLQRELEDVTEAESMNREVTTLRNLRRGPLTFTTRTVRQVF--R    | 1962 |
| TR A0A125S9Y7 A0A125S9Y7_9ARAC | EAEERIAALNLAKFRKVQLEDAEERADMAENVAALKLRAKNRSSASVGRAMSPIPMGKPG  | 1944 |

\*\*\*\* : \* \*::\*:\*\*:. \* : . . \*: : \* .

----- (Tail piece) ----->

|                                |                                      |      |
|--------------------------------|--------------------------------------|------|
| SP P35579 MYH9_HUMAN           | -A---GDGSDEEV-D-----GK-ADGAEAKPAE--  | 1960 |
| SP P35580 MYH10_HUMAN          | LH---LEGASLEL-SDDDTESKTSVDNETQPPQSE  | 1976 |
| SP P35749 MYH11_HUMAN          | VIENA-DGSEEEET-DTRDA-----DFNGTKASE-- | 1972 |
| SP P10587 MYH11_CHICK          | VIENTATGGEEEI-DGRDG-----DFNGKASE---  | 1979 |
| SP O08638 MYH11_MOUSE          | VIENT-DGSEEEEM-DARDS-----DFNGTKASE-- | 1972 |
| SP Q7Z406 MYH14_HUMAN          | LEE--GVASDEEAEEAQPGSGPSPEPEGSPPAHPQ  | 1995 |
| TR A0A125S9Y7 A0A125S9Y7_9ARAC | RPKS---KIDEE-----                    | 1953 |

. \*
